# Supplementary material
Source: Royal Society of Chemistry journal article supplement (doi:10.1039/d6nr00551a)
Supplement: d6nr00551a1.pdf [file d6nr00551a1.pdf]

## Supplementary Information

### High-Performance Photodetector Enabled by Melamine Cation Based Lead Free Perovskitoid Single Crystals

*Xin Yang,<sup>a,b</sup> Yu-Hua Huang,<sup>a</sup> Qiang-Sheng Zhang,<sup>c</sup> Xu-Dong Wang\*<sup>a</sup> and Dai-Bin Kuang\*<sup>a</sup>*

<sup>a</sup>Key Laboratory of Bioinorganic and Synthetic Chemistry of Ministry of Education, LIFM, GBRCE for Functional Molecular Engineering, School of Chemistry, IGCME, Sun Yat-Sen University, Guangzhou 510275, China.

<sup>b</sup>School of Chemistry, Guangdong University of Petrochemical Technology, Maoming 525000, China.

<sup>c</sup>Hainan Provincial Key Laboratory of Fine Chem, School of Chemistry and Chemical Engineering, Hainan University, Haikou 570228, China.

E-mail: wangxd26@mail.sysu.edu.cn (X.-D. Wang); kuangdb@mail.sysu.edu.cn (D. B. Kuang)

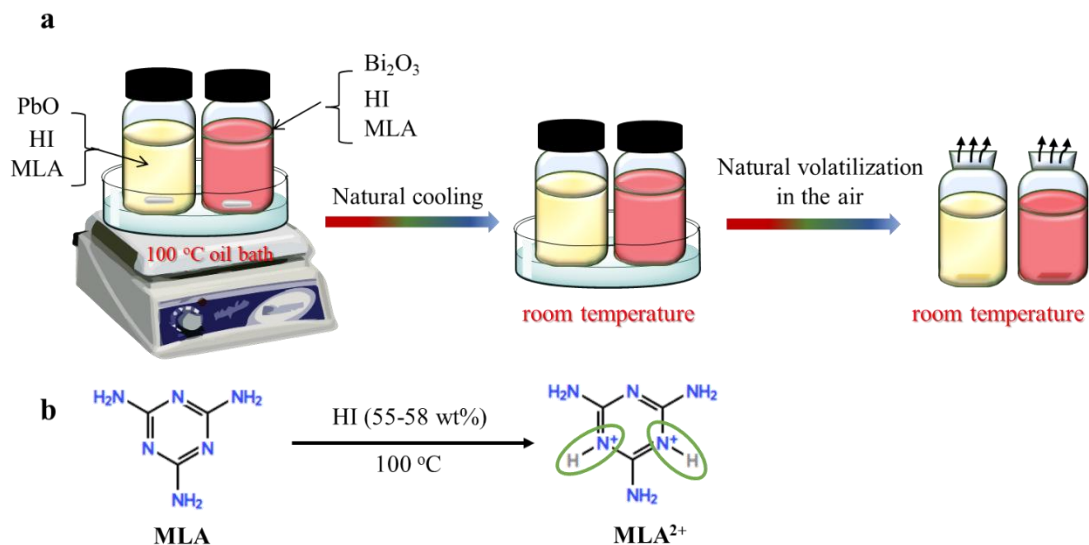

**Fig. S1.** (a) Synthesis schematic diagram of single crystal of the  $(\text{MLA})_2\text{PbI}_6 \cdot 2\text{H}_2\text{O}$  and  $(\text{MLA})_2\text{Bi}_2\text{I}_{10} \cdot 8\text{H}_2\text{O}$  SCs. (b) Two *N* atoms in MLA molecule are protonated.

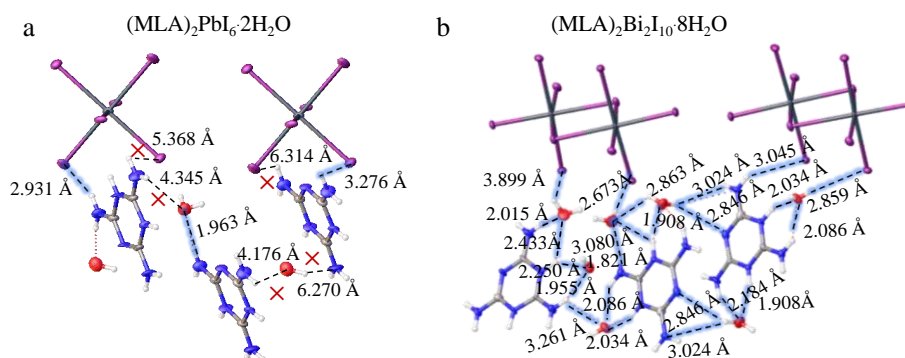

**Fig. S2.** Hydrogen bonding networks in  $(\text{MLA})_2\text{PbI}_6 \cdot 2\text{H}_2\text{O}$  and  $(\text{MLA})_2\text{Bi}_2\text{I}_{10} \cdot 8\text{H}_2\text{O}$  SCs, water molecules acting as bridging mediators to strengthen organic ligand interactions.

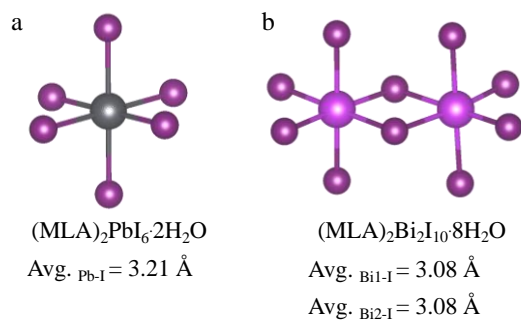

**Fig. S3.** Average M-I bond lengths of inorganic octahedra of the (MLA)<sub>2</sub>PbI<sub>6</sub>·2H<sub>2</sub>O (a) and (MLA)<sub>2</sub>Bi<sub>2</sub>I<sub>10</sub>·8H<sub>2</sub>O (b) SCs.

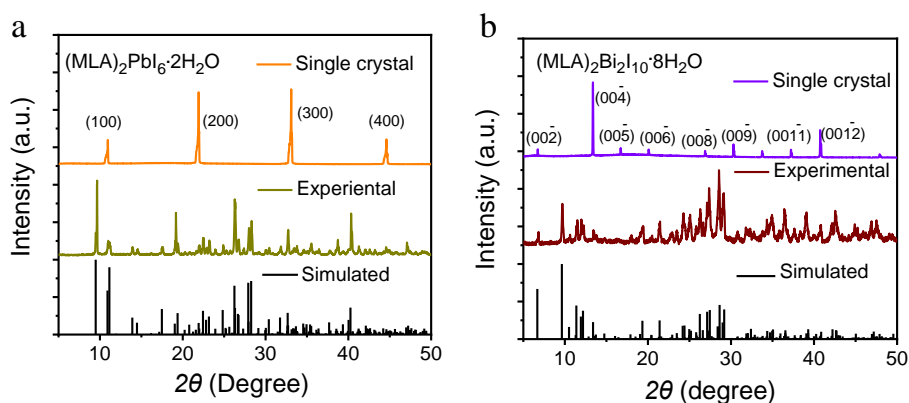

**Fig. S4.** The XRD patterns of (MLA)<sub>2</sub>PbI<sub>6</sub>·2H<sub>2</sub>O and (MLA)<sub>2</sub>Bi<sub>2</sub>I<sub>10</sub>·8H<sub>2</sub>O.

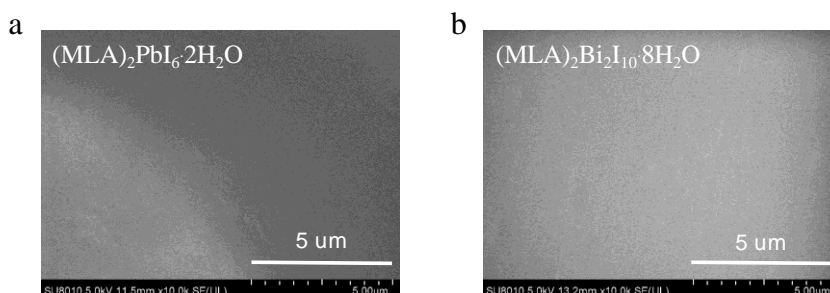

**Fig. S5.** Top-view SEM images of the (MLA)<sub>2</sub>PbI<sub>6</sub>·2H<sub>2</sub>O and (MLA)<sub>2</sub>Bi<sub>2</sub>I<sub>10</sub>·8H<sub>2</sub>O SCs.

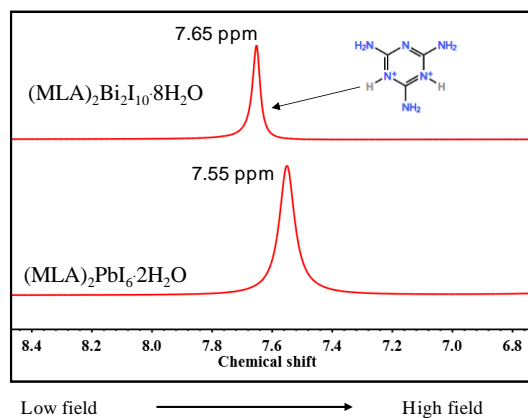

**Fig. S6.** The <sup>1</sup>H-NMR spectra of (MLA)<sub>2</sub>PbI<sub>6</sub>·2H<sub>2</sub>O and (MLA)<sub>2</sub>Bi<sub>2</sub>I<sub>10</sub>·8H<sub>2</sub>O dissolved in DMSO-d<sub>6</sub> solvent.

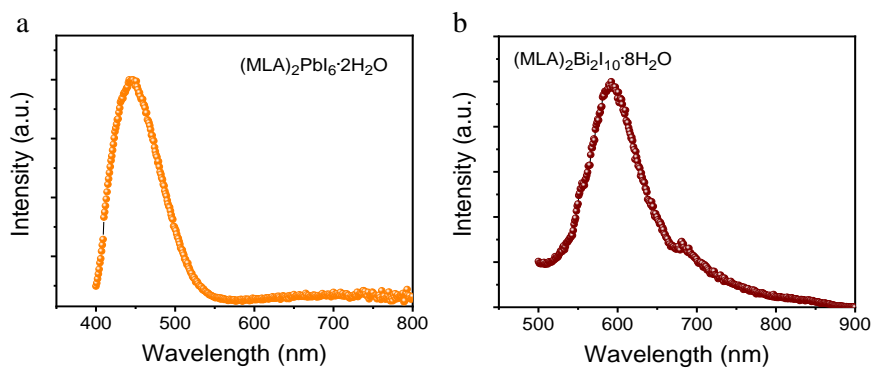

**Fig. S7.** (a, b) The Photoluminescence spectra of (MLA)<sub>2</sub>PbI<sub>6</sub>·2H<sub>2</sub>O and (MLA)<sub>2</sub>Bi<sub>2</sub>I<sub>10</sub>·8H<sub>2</sub>O.

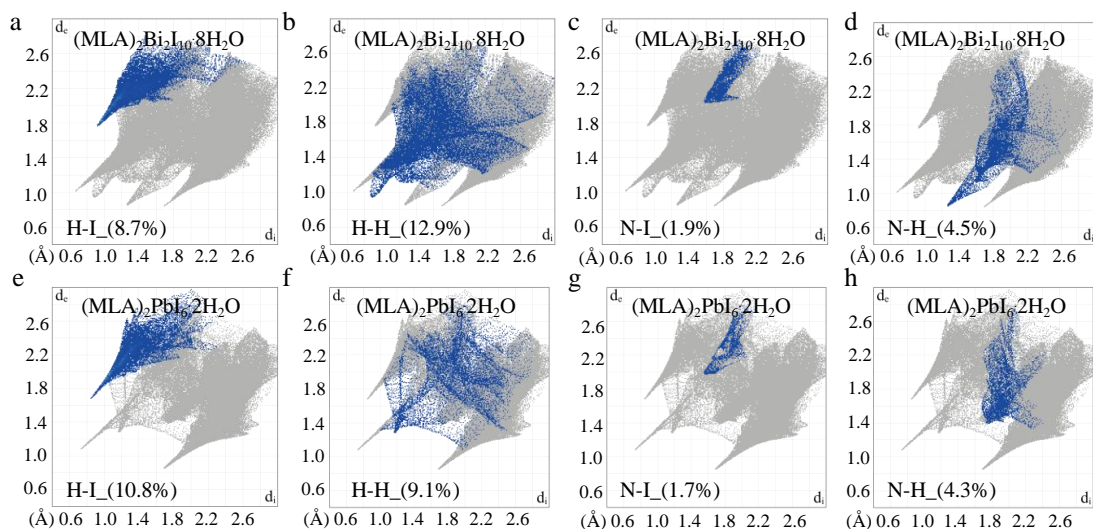

**Fig. S8.** 2D fingerprint plots of  $(\text{MLA})_2\text{PbI}_6\cdot 2\text{H}_2\text{O}$  (a-d) and  $(\text{MLA})_2\text{Bi}_2\text{I}_{10}\cdot 8\text{H}_2\text{O}$  (e-h).

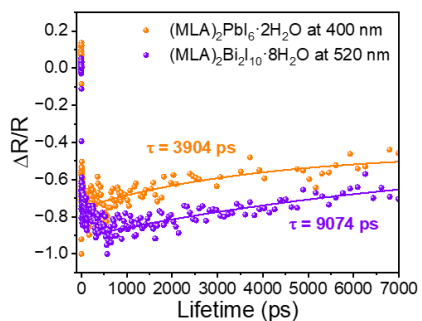

**Fig. S9.** TR kinetic fit of  $(\text{MLA})_2\text{PbI}_6\cdot 2\text{H}_2\text{O}$  and  $(\text{MLA})_2\text{Bi}_2\text{I}_{10}\cdot 8\text{H}_2\text{O}$  SCs recorded at 400 and 520 nm, respectively.

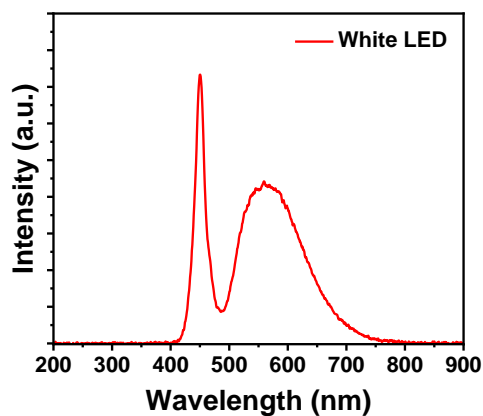

**Fig. S10.** White LED light wavelength spectrum.

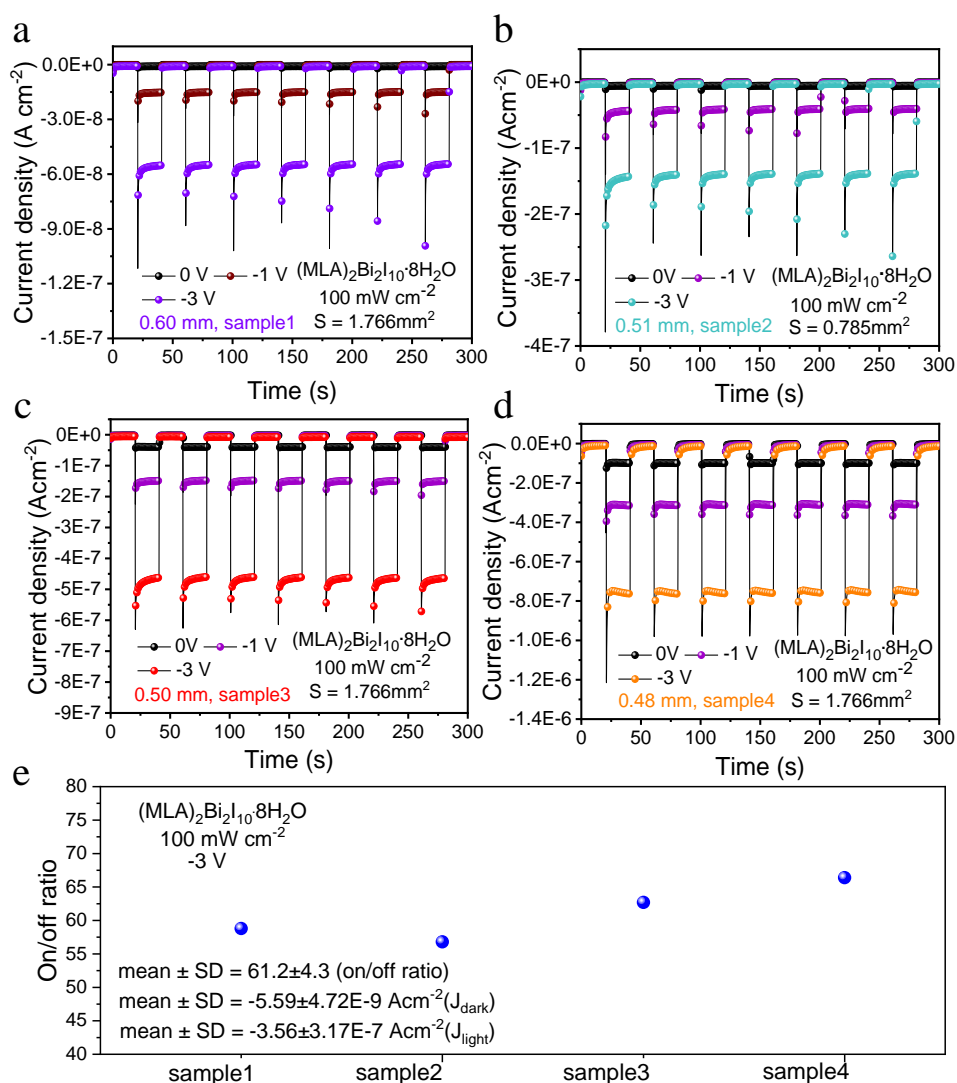

**Fig. S11.** (a-d) The  $i$ - $t$  curves of Bi-SC devices at  $100\text{ mW cm}^{-2}$ , the illumination wavelength is approximately 400–750 nm. (e) The on/off ratios of different Bi-based devices at  $-3\text{ V}$ .

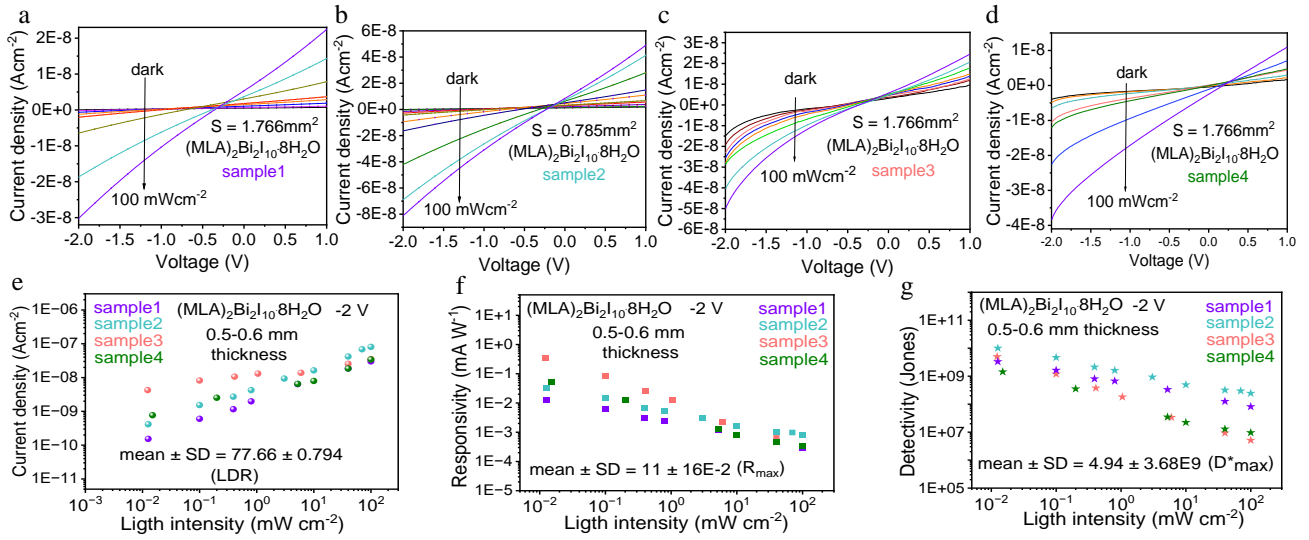

**Fig. S12.** The  $i/v$  curves of Bi-SC devices with different batches (a-c). (d-f) Linear dynamic range (LDR), responsivity ( $R$ ), and detectivity ( $D^*$ ) of the Bi-SC device calculated from Fig. S11a-d at  $-2$  V bias under varying light intensities, the illumination wavelength is approximately 400-750 nm.

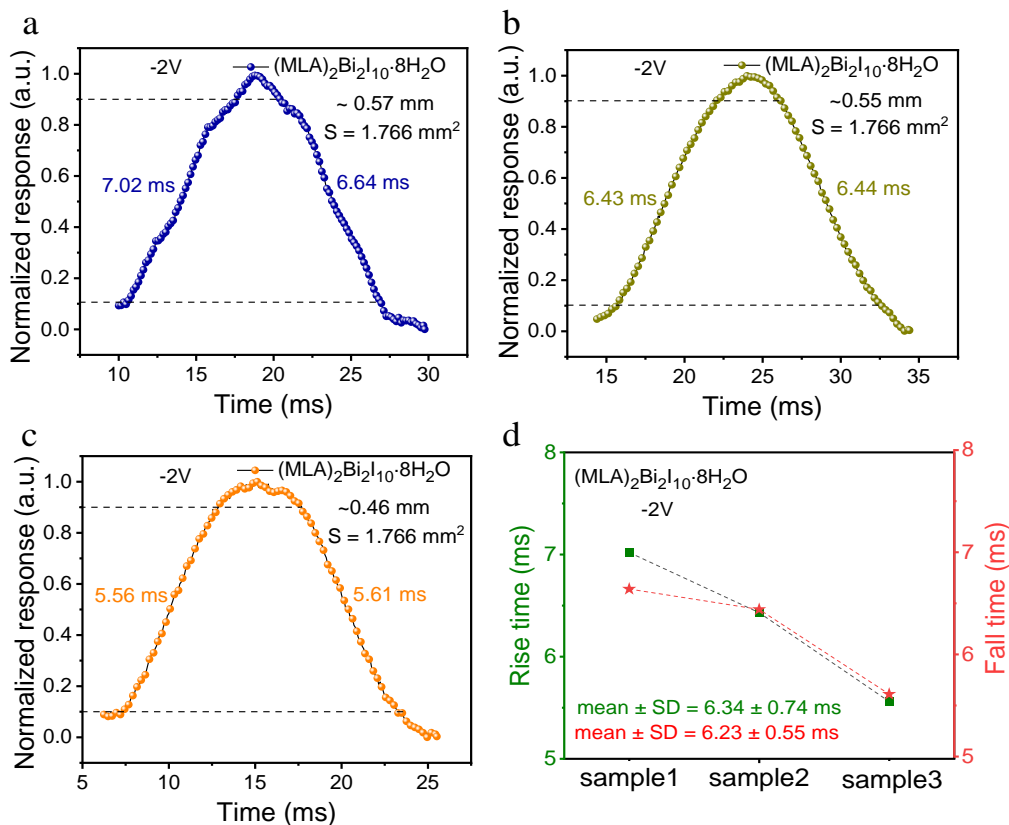

**Fig. S13.** (a-c) Response time of Bi-SC devices with different thicknesses under a transient white light excitation. Rise time is the time required for the output signal to rise from 10% to 90% of its final stable value, while fall time is the time required for it to fall from 90% to 10% of its stable value after the input signal was removed. (d) The average response time and standard deviation of different devices.

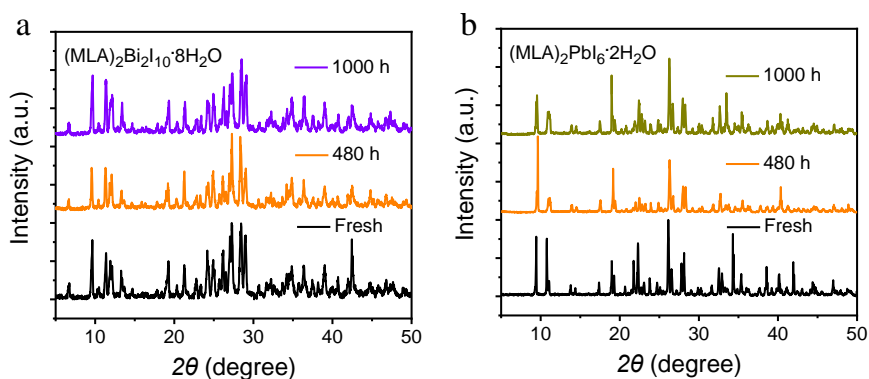

**Fig. S14.** The humidity stability of  $(\text{MLA})_2\text{Bi}_2\text{I}_{10}\cdot 8\text{H}_2\text{O}$  (a) and  $(\text{MLA})_2\text{PbI}_6\cdot 2\text{H}_2\text{O}$  (b) powders in air with ~ 55% humidity.

**Table S1.** Crystal data for the (MLA)<sub>2</sub>PbI<sub>6</sub>·2H<sub>2</sub>O and (MLA)<sub>2</sub>Bi<sub>2</sub>I<sub>10</sub>·8H<sub>2</sub>O.

| Compounds                               | (MLA) <sub>2</sub> PbI <sub>6</sub> ·2H <sub>2</sub> O                          | (MLA) <sub>2</sub> Bi <sub>2</sub> I <sub>10</sub> ·8H <sub>2</sub> O                         |
|-----------------------------------------|---------------------------------------------------------------------------------|-----------------------------------------------------------------------------------------------|
| Empirical formula                       | C <sub>6</sub> H <sub>20</sub> I <sub>6</sub> N <sub>12</sub> O <sub>2</sub> Pb | C <sub>6</sub> H <sub>32</sub> Bi <sub>2</sub> I <sub>10</sub> N <sub>12</sub> O <sub>8</sub> |
| crystal system                          | monoclinic                                                                      | triclinic                                                                                     |
| space group                             | P2 <sub>1</sub> /c                                                              | P-1                                                                                           |
| unit cell dimensions                    | $a = 8.32180(10) \text{ \AA}$                                                   | $a = 8.3908(5) \text{ \AA}$                                                                   |
|                                         | $b = 18.6369(3) \text{ \AA}$                                                    | $b = 9.9930(5) \text{ \AA}$                                                                   |
|                                         | $c = 9.01090(10) \text{ \AA}$                                                   | $c = 26.7613(12) \text{ \AA}$                                                                 |
|                                         | $\alpha = 90^\circ$                                                             | $\alpha = 95.723(4)^\circ$                                                                    |
|                                         | $\beta = 103.159(2)^\circ$                                                      | $\beta = 94.650(4)^\circ$                                                                     |
|                                         | $\gamma = 90^\circ$                                                             | $\gamma = 110.042(5)^\circ$                                                                   |
| volume                                  | 1360.83(3)                                                                      | 2081.5(2)                                                                                     |
| Z                                       | 2                                                                               | 2                                                                                             |
| density (calculated)                    | 3.077                                                                           | 3.330                                                                                         |
| $\mu/\text{mm}^{-1}$                    | 65.730                                                                          | 75.009                                                                                        |
| index ranges                            | $-10 \leq h \leq 10, -22 \leq k \leq 22, -10 \leq l \leq 6$                     | $-9 \leq h \leq 10, -9 \leq k \leq 12, -33 \leq l \leq 29$                                    |
| Independent reflections                 | 2620 [ $R_{\text{int}} = 0.0344, R_{\text{sigma}} = 0.0401$ ]                   | 7909 [ $R_{\text{int}} = 0.0618, R_{\text{sigma}} = 0.0924$ ]                                 |
| Data/restraints/parameters              | 2620/0/128                                                                      | 7909/54/343                                                                                   |
| Goodness-of-fit on $F^2$                | 1.048                                                                           | 0.868                                                                                         |
| Final R indexes [ $I \geq 2\sigma(I)$ ] | $R_1 = 0.0461, wR_2 = 0.1256$                                                   | $R_1 = 0.0427, wR_2 = 0.0775$                                                                 |
| Largest diff. peak/hole                 | $e \text{ \AA}^{-3} 2.20/-4.63$                                                 | $e \text{ \AA}^{-3} 1.78/-1.49$                                                               |

**Table S2.** Comparison carrier mobilities and densities of trap state of (MLA)<sub>2</sub>PbI<sub>6</sub>·2H<sub>2</sub>O and (MLA)<sub>2</sub>Bi<sub>2</sub>I<sub>10</sub>·8H<sub>2</sub>O single crystals with literature.

| Single crystals                                                       | $n_t$<br>(cm <sup>-3</sup> ) | $\mu$<br>(cm <sup>2</sup> V <sup>-1</sup> s <sup>-1</sup> ) | Ref.      |
|-----------------------------------------------------------------------|------------------------------|-------------------------------------------------------------|-----------|
| Cs <sub>3</sub> Bi <sub>2</sub> I <sub>9</sub>                        | $1.4 \times 10^{10}$         | /                                                           | 1         |
| (BZA) <sub>3</sub> BiI <sub>6</sub>                                   | $4.25 \times 10^{11}$        | $6.16 \times 10^{-3}$                                       | 2         |
| Cs <sub>3</sub> Bi <sub>2</sub> I <sub>9</sub>                        | $5.7 \times 10^{12}$         | $1.7 \times 10^{-2}$                                        | 3         |
| (FA) <sub>3</sub> Bi <sub>2</sub> I <sub>9</sub>                      | $9.48 \times 10^9$           | $8.9 \times 10^{-3}$                                        | 4         |
| (MLA) <sub>2</sub> PbI <sub>6</sub> ·2H <sub>2</sub> O                | $3.84 \times 10^{10}$        | $3.29 \times 10^{-4}$                                       | This work |
| (MLA) <sub>2</sub> Bi <sub>2</sub> I <sub>10</sub> ·8H <sub>2</sub> O | $4.30 \times 10^9$           | $4.17 \times 10^{-2}$                                       | This work |

**Table S3.** Comparison the on/off ratio of (MLA)<sub>2</sub>PbI<sub>6</sub>·2H<sub>2</sub>O and (MLA)<sub>2</sub>Bi<sub>2</sub>I<sub>10</sub>·8H<sub>2</sub>O with reported lead-free perovskite single crystals.

| Perovskite SCs                                                           | Bias<br>voltage<br>(V) | On/Off ratio | Ref.      |
|--------------------------------------------------------------------------|------------------------|--------------|-----------|
| 0D Cs <sub>3</sub> Bi <sub>2</sub> I <sub>9</sub>                        | 300                    | > 40         | 5         |
| 0D (BZA) <sub>3</sub> BiI <sub>6</sub>                                   | 1                      | < 2          | 2         |
| 0D MA <sub>3</sub> Sb <sub>2</sub> I <sub>9</sub>                        | 5                      | 9            | 6         |
| 0D GA <sub>3</sub> Bi <sub>2</sub> I <sub>9</sub>                        | -                      | ~ 3          | 7         |
| 3D Cs <sub>2</sub> AgBiBr <sub>6</sub>                                   | 8                      | 42           | 8         |
| 1D CsCu <sub>2</sub> I <sub>3</sub>                                      | 3                      | 31.5         | 9         |
| 1D (TMHD)BiBr <sub>5</sub>                                               | 10                     | 683          | 10        |
| 0D (MLA) <sub>2</sub> Bi <sub>2</sub> I <sub>10</sub> ·8H <sub>2</sub> O | 1                      | 45           | This work |
| 0D (MLA) <sub>2</sub> PbI <sub>6</sub> ·2H <sub>2</sub> O                | 1                      | 3            | This work |

## References

- [1] Y. Zhang, Y. Liu, Z. Xu, H. Ye, Z. Yang, J. You, M. Liu, Y. He, M. Kanatzidis, S. Liu, *Nat. Commun.*, 2020, **11**, 2304.
- [2] X. Yang, Y. H. Huang, X. D. Wang, W. G. Li, D. B. Kuang, *Angew. Chem. Int. Ed.*, 2022, **61**, e202204663.
- [3] W. G. Li, X. D. Wang, J. F. Liao, Y. Jiang, D. B. Kuang, *Adv. Funct. Mater.*, 2020, **30**, 1909701.
- [4] W. Li, D. Xin, S. Tie, J. Ren, S. Dong, L. Lei, X. Zheng, Y. Zhao, W. Zhang, *J. Phys. Chem. Lett.*, 2021, **12**, 1778-1785.
- [5] Q. Sun, Y. Xu, H. Zhang, B. Xiao, X. Liu, J. Dong, Y. Cheng, B. Zhang, W. Jie, M. Kanatzidis, *J. Mater. Chem. A*, 2018, **6**, 23388-23395.
- [6] B. Yang, Y. Li, Y. Tang, X. Mao, C. Luo, M. Wang, W. Deng, K. Han, *J. Phys. Chem. Lett.*, 2018, **9**, 3087-3092.
- [7] Y. Xu, J. Hu, X. Xiao, H. He, G. Tong, J. Chen, Y. He, *Inorg. Chem. Front.*, 2022, **9**, 494-500.
- [8] Y. Dang, G. Tong, W. Song, Z. Liu, L. Qiu, L. Ono, Y. Qi, *J. Mater. Chem. C*, 2020, **8**, 276-284.
- [9] Z. Li, Z. Li, Z. Shi, X. Fang, *Adv. Funct. Mater.*, 2020, **30**, 2002634.
- [10] C. Ji, P. Wang, Z. Wu, Z. Sun, L. Li, J. Zhang, W. Hu, M. Hong, J. Luo, *Adv. Funct. Mater.*, 2018, **28**, 1705467.
